# Supplementary material
Source: PubMed Central journal article supplement (PMC5866973)
Supplement: BPH-175-1190-s001.pdf [file BPH-175-1190-s001.pdf]

**Supporting information to  
Metabolic Profiling of Murine Plasma Reveals Eicosapentaenoic Acid  
Metabolites Protecting against Endothelial Activation and  
Atherosclerosis**

Yajin Liu<sup>1\*</sup>, Xuan Fang<sup>2\*</sup>, Xu Zhang<sup>1</sup>, Jing Huang<sup>1</sup>, Jinlong He<sup>1</sup>, Liyuan Peng<sup>1</sup>,  
Chenji Ye<sup>1</sup>, Yingmei Wang<sup>3</sup>, Fengxia Xue<sup>3</sup>, Ding Ai<sup>1</sup>, Dan Li<sup>2#</sup> and Yi Zhu<sup>1#</sup>

<sup>1</sup>Tianjin Key Laboratory of Metabolic Diseases and Department of Physiology  
and Pathophysiology, Tianjin Medical University, Tianjin, 300070, China;

<sup>2</sup>Department of Physiology and Pathophysiology, Peking University Health  
Science Center, Beijing, 100191, China;

<sup>3</sup>Department of Gynecology and Obstetrics, Tianjin Medical University  
General Hospital, Tianjin, 300052, China.

**Running title:** Metabolic profiling of EPA metabolites for atheroprotection

<sup>\*</sup>, these authors contribute equally to this work.

**#Correspondence:**

Dan Li, PhD:

Department of Physiology and Pathophysiology, Peking University Health  
Science Center, Beijing, 100191, China, E-mail: yidan\_cpu@126.com;

Yi Zhu, MD:

Department of Physiology and Pathophysiology, Tianjin Medical University,  
Tianjin, 300070, China. Tel: (+86) 22-8333-6665; E-mail: zhuyi@tmu.edu.cn.

### Supporting information Figure S1

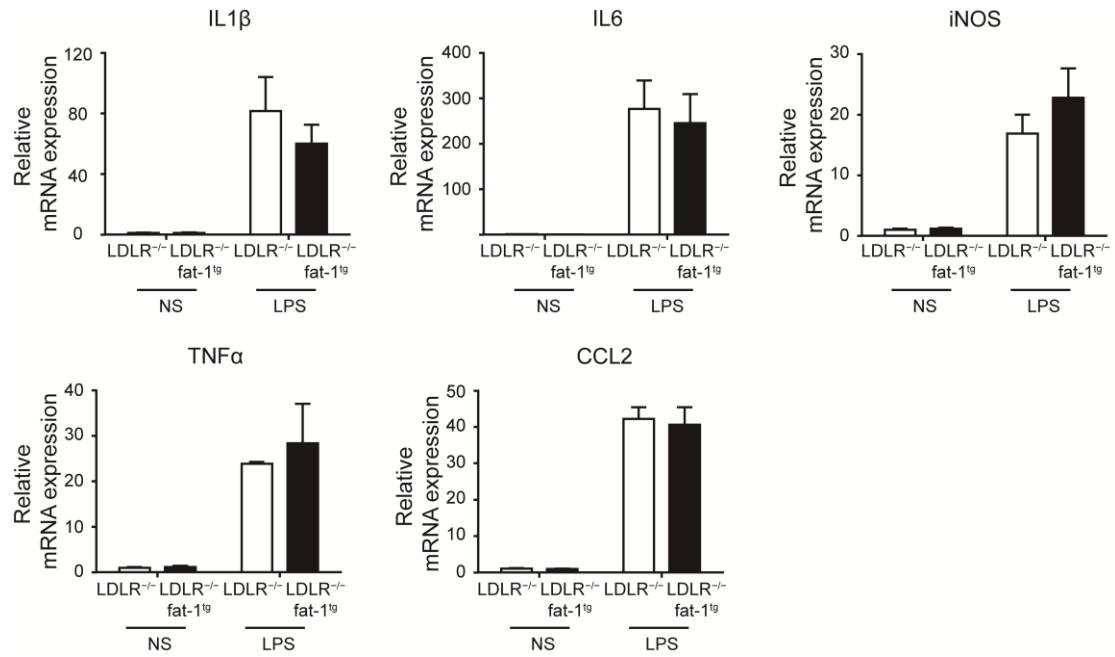

**Figure S1. LPS induced the proinflammatory gene expression in macrophages from in LDLR<sup>-/-</sup> and LDLR<sup>-/-</sup>fat-1<sup>tg</sup> mice.**

Macrophages were isolated from LDLR<sup>-/-</sup> and LDLR<sup>-/-</sup>fat-1<sup>tg</sup> mice. Proinflammatory gene expression were measured of the macrophages after lipopolysaccharide stimulation (1 ng ml<sup>-1</sup>) for 4 h. n = 5 for each group. Data are mean  $\pm$  SEM.

## Supporting information Table

**Table S1. List of oligonucleotide primer pairs used in qPCR**

| Target Gene      | Sense Primer                      | Antisense Primer                  |
|------------------|-----------------------------------|-----------------------------------|
| mCd68            | 5'-CCCAAGGAACAGAGGAAG-3'          | 5'-GTGGCAGGGTTATGAGTG-3'          |
| mF4/80           | 5'-CTTTGGCTATGGGCTTCCAGTC-3'      | 5'-GCAAGGAGGACAGAGTTTATCGTG-3'    |
| mVCAM1           | 5'-AGTTGGGGATTTCGGTTGTTCT-3'      | 5'-CCCCTCATTCTTACCACCC-3'         |
| mICAM1           | 5'-GTGATGCTCAGGTATCCATCCA-3'      | 5'-CACAGTTCTCAAAGCACAGCG-3'       |
| mE-Selectin      | 5'-ATGAAGCCAGTGCATACTGTC-3'       | 5'-CGGTGAATGTTTCAGATTGGAGT-3'     |
| mP-Selectin      | 5'-CATCTGGTTCAGTGCTTTGATCT-3'     | 5'-ACCCGTGAGTTATTCCATGAGT-3'      |
| mIL-1 $\beta$    | 5'-GCCATCCTCTGTGACTCAT-3'         | 5'-AGGCCACAGGTATTTTGTCTG-3'       |
| mIL-4            | 5'-GGTCTCAACCCCCAGCTAGT-3'        | 5'-GCCGATGATCTCTCTCAAGTGAT-3'     |
| mIL-6            | 5'-ACAACCACGGCCTTCCCTACTT-3'      | 5'-CACGATTTCCAGAGAACATGTG-3'      |
| mIL-10           | 5'-GATTTTAATAAGCTCCAAGACCAAGGT-3' | 5'-CTTCTATGCAGTTGATGAAGATGTCAA-3' |
| miNOS            | 5'-CCCCGCTACTACTCCATCAG-3'        | 5'-CCACTGACACTTCGCACAAA-3'        |
| mTNF $\alpha$    | 5'-CCAGACCCTCACACTCAGATC-3'       | 5'-CACTTGGTGGTTTGCTACGAC-3'       |
| m $\beta$ -actin | 5'-CTGTCCCTGTATGCCTCT-3'          | 5'-ATGTCACGCACGATTTCC-3'          |
| mCCL2            | 5'-AGCCAACTCTCACTGAAGCCA-3'       | 5'-TCTGGACCCATTCTTCTTGG-3'        |
| mCCL3            | 5'-TTCTCTGTACCATGACACTCTGC-3'     | 5'-CGTGAATCTTCCGGCTGTAG-3'        |
| mCCL4            | 5'-TTCCTGCTGTTTCTTTACACCT-3'      | 5'-CTGTCTGCCTCTTTTGGTCAG-3'       |
| mCCL5            | 5'-TCGAGTGACAAACACGACTGC-3'       | 5'-GCTGCTTTGCCTACCTCTCC-3'        |
| mCCL7            | 5'-GCTGCTTTCAGCATCCAAGTG-3'       | 5'-CCAGGGACACCGACTACTG-3'         |
| hVCAM1           | 5'-CGAACCCAAACAAAGGCAGA-3'        | 5'-ACAGGATTTTCGGAGCAGGA-3'        |
| hE-Selectin      | 5'-GCCTGCAATGTGGTTGAGTG-3'        | 5'-GCACCTCACAGAGCCATTCT-3'        |
| hCCL2            | 5'-GATCTCAGTGACAGAGGCTCG-3'       | 5'-TTTGCTTGTCCAGGTGGTCC-3'        |
| hGAPDH           | 5'-GAAGGTGAAGGTCGGAGTC-3'         | 5'-GAAGATGGTGATGGGATTTTC-3'       |

“m” indicates mouse gene ; “h” indicates human gene.

**Table S2. Comparison of PUFA metabolites in plasma from LDLR<sup>-/-</sup> with different diets**

| Name of metabolites | WD (ng $\mu\text{L}^{-1}$ ) |        | WD+ $\omega$ -3 (ng $\mu\text{L}^{-1}$ ) |         | p value (non-parametric) | -log (p value) |
|---------------------|-----------------------------|--------|------------------------------------------|---------|--------------------------|----------------|
|                     | mean                        | SD     | mean                                     | SD      |                          |                |
| 15d-PGJ2            | 0.006                       | 0.005  | 0.056                                    | 0.061   | 0.035                    | 1.45           |
| 6k-PGF1a            | 0.144                       | 0.065  | 0.119                                    | 0.060   | 0.166                    | 0.78           |
| PGB2                | 0.010                       | 0.008  | 0.209                                    | 0.241   | 0.000                    | 4.33           |
| PGD2                | 0.710                       | 0.564  | 0.612                                    | 0.548   | 0.468                    | 0.33           |
| PGE2                | 0.120                       | 0.075  | 0.308                                    | 0.169   | 0.000                    | 4.07           |
| PGF2a               | 0.198                       | 0.111  | 0.094                                    | 0.047   | 0.000                    | 3.55           |
| PGJ2                | 0.006                       | 0.008  | 0.005                                    | 0.005   | 0.813                    | 0.09           |
| 11-HETE             | 0.518                       | 0.550  | 0.479                                    | 0.434   | 0.741                    | 0.13           |
| 12-HETE             | 17.995                      | 12.991 | 16.031                                   | 16.121  | 0.488                    | 0.31           |
| 15-HETE             | 1.355                       | 1.151  | 1.363                                    | 1.014   | 0.843                    | 0.07           |
| 15-oxo-ETE          | 0.374                       | 0.364  | 0.671                                    | 0.631   | 0.235                    | 0.63           |
| 5-HETE              | 2.349                       | 1.589  | 2.703                                    | 2.274   | 0.947                    | 0.02           |
| 5-oxo-ETE           | 0.740                       | 0.784  | 1.439                                    | 1.557   | 0.198                    | 0.70           |
| 6R-LXA4             | 0.640                       | 1.024  | 41.470                                   | 58.860  | 0.000                    | 5.24           |
| 8-HETE              | 1.320                       | 1.216  | 0.659                                    | 0.777   | 0.051                    | 1.30           |
| 9-HETE              | 3.302                       | 3.710  | 2.548                                    | 3.374   | 0.407                    | 0.39           |
| LTB4                | 0.367                       | 0.634  | 0.506                                    | 0.760   | 0.569                    | 0.25           |
| 11,12-EET           | 0.458                       | 0.313  | 0.483                                    | 0.592   | 0.338                    | 0.47           |
| 11,12 DHET          | 0.280                       | 0.151  | 0.145                                    | 0.064   | 0.001                    | 2.91           |
| 14,15-EET           | 0.632                       | 0.417  | 0.762                                    | 0.710   | 0.843                    | 0.07           |
| 14,15 DHET          | 0.702                       | 0.337  | 0.361                                    | 0.177   | 0.001                    | 3.12           |
| 17-HETE             | 0.051                       | 0.043  | 0.109                                    | 0.116   | 0.113                    | 0.95           |
| 18-HETE             | 0.203                       | 0.092  | 0.294                                    | 0.224   | 0.338                    | 0.47           |
| 5,6-EET             | 0.447                       | 0.391  | 0.203                                    | 0.181   | 0.040                    | 1.39           |
| 5,6-DHET            | 1.186                       | 1.317  | 0.321                                    | 0.242   | 0.064                    | 1.19           |
| 8,9-EET             | 0.674                       | 0.358  | 0.606                                    | 0.576   | 0.086                    | 1.07           |
| 8,9-DHET            | 0.540                       | 0.410  | 0.197                                    | 0.105   | 0.000                    | 3.95           |
| 10-HDoHE            | 1.410                       | 0.724  | 8.249                                    | 7.065   | 0.000                    | 5.08           |
| 11-HDoHE            | 1.312                       | 0.762  | 10.248                                   | 8.963   | 0.000                    | 4.94           |
| 13-HDoHE            | 0.887                       | 0.680  | 5.697                                    | 4.278   | 0.000                    | 5.63           |
| 14-HDoHE            | 20.636                      | 12.252 | 132.250                                  | 135.583 | 0.000                    | 4.88           |
| 20-HDoHE            | 1.785                       | 2.024  | 21.517                                   | 23.620  | 0.000                    | 5.70           |
| 4-HDoHE             | 1.997                       | 1.282  | 22.724                                   | 16.859  | 0.000                    | 6.06           |
| 7-HDoHE             | 0.777                       | 0.580  | 4.716                                    | 3.070   | 0.000                    | 5.42           |
| 8-HDoHE             | 1.611                       | 1.073  | 12.084                                   | 9.250   | 0.000                    | 4.88           |
| RvD1                | 0.139                       | 0.214  | 0.775                                    | 1.022   | 0.042                    | 1.38           |
| 16,17-EDP           | 0.715                       | 0.707  | 6.084                                    | 4.747   | 0.000                    | 5.70           |
| 19,20-EDP           | 2.326                       | 2.478  | 19.015                                   | 12.817  | 0.000                    | 5.49           |
| PGF3a               | 0.732                       | 0.376  | 0.892                                    | 0.419   | 0.222                    | 0.65           |
| 11-HEPE             | 0.078                       | 0.056  | 4.752                                    | 4.092   | 0.000                    | 6.35           |
| 12-HEPE             | 10.851                      | 8.270  | 605.688                                  | 617.493 | 0.000                    | 5.98           |
| 15-HEPE             | 0.426                       | 0.588  | 23.568                                   | 32.301  | 0.000                    | 6.21           |
| 5-HEPE              | 0.404                       | 0.220  | 28.466                                   | 37.938  | 0.000                    | 5.91           |

|              |       |       |         |        |       |      |
|--------------|-------|-------|---------|--------|-------|------|
| 8-HEPE       | 0.234 | 0.177 | 4.945   | 3.967  | 0.000 | 6.35 |
| 9-HEPE       | 0.379 | 0.213 | 20.399  | 18.865 | 0.000 | 5.84 |
| 11,12-DiHETE | 5.559 | 4.097 | 123.114 | 70.278 | 0.000 | 6.35 |
| 11,12-EEQ    | 0.106 | 0.061 | 3.570   | 2.527  | 0.000 | 6.35 |
| 14,15-DiHETE | 0.725 | 0.475 | 11.215  | 4.973  | 0.000 | 6.35 |
| 14,15-EEQ    | 0.056 | 0.045 | 3.284   | 2.084  | 0.000 | 6.35 |
| 17,18-DiHETE | 0.547 | 0.375 | 5.866   | 3.274  | 0.000 | 6.35 |
| 17,18-EEQ    | 0.221 | 0.195 | 9.722   | 7.491  | 0.000 | 6.35 |
| 18-HEPE      | 0.200 | 0.185 | 10.262  | 10.802 | 0.000 | 6.35 |
| 5,6-DiHETE   | 0.396 | 0.135 | 4.330   | 1.873  | 0.000 | 6.35 |
| 5,6-EEQ      | 0.428 | 0.497 | 11.031  | 11.548 | 0.000 | 6.28 |
| 8,9-DiHETE   | 2.019 | 1.221 | 36.227  | 22.079 | 0.000 | 6.35 |
| 8,9-EEQ      | 0.135 | 0.124 | 3.602   | 2.454  | 0.000 | 6.35 |

---

**Table S3. Comparison of PUFA metabolites in plasma from LDLR<sup>-/-</sup> and LDLR<sup>-/-</sup>-fat-1<sup>tg</sup> mice with WTD**

| Name of metabolites | LDLR <sup>-/-</sup> mice (ng μL <sup>-1</sup> ) |        | LDLR <sup>-/-</sup> -Fat-1 <sup>tg</sup> mice (ng μL <sup>-1</sup> ) |         | p value (non-parametric) | -log (p value) |
|---------------------|-------------------------------------------------|--------|----------------------------------------------------------------------|---------|--------------------------|----------------|
|                     | mean                                            | SD     | mean                                                                 | SD      |                          |                |
| 15d-PGJ2            | 0.008                                           | 0.003  | 0.013                                                                | 0.004   | 0.279                    | 0.55           |
| 6k-PGF1a            | 0.136                                           | 0.071  | 0.161                                                                | 0.084   | 0.798                    | 0.10           |
| PGB2                | 0.011                                           | 0.008  | 0.018                                                                | 0.013   | 0.959                    | 0.02           |
| PGD2                | 0.740                                           | 0.546  | 0.884                                                                | 0.532   | 0.878                    | 0.06           |
| PGE2                | 0.120                                           | 0.081  | 0.234                                                                | 0.265   | 0.959                    | 0.02           |
| PGF2a               | 0.199                                           | 0.128  | 0.172                                                                | 0.110   | 0.382                    | 0.42           |
| PGJ2                | 0.008                                           | 0.008  | 0.021                                                                | 0.031   | 1.000                    | 0.00           |
| 11-HETE             | 0.437                                           | 0.423  | 0.653                                                                | 0.608   | 0.959                    | 0.02           |
| 12-HETE             | 16.458                                          | 12.982 | 19.274                                                               | 20.276  | 0.130                    | 0.88           |
| 15-HETE             | 1.346                                           | 0.960  | 1.582                                                                | 1.738   | 0.645                    | 0.19           |
| 15-oxo-ETE          | 0.356                                           | 0.323  | 0.363                                                                | 0.232   | 0.442                    | 0.35           |
| 5-HETE              | 2.418                                           | 1.672  | 3.314                                                                | 3.672   | 0.105                    | 0.98           |
| 5-oxo-ETE           | 0.638                                           | 0.654  | 0.846                                                                | 0.868   | 0.959                    | 0.02           |
| 6R-LXA4             | 0.505                                           | 0.932  | 0.693                                                                | 0.760   | 0.959                    | 0.02           |
| 8-HETE              | 1.691                                           | 1.220  | 1.165                                                                | 1.266   | 0.130                    | 0.88           |
| 9-HETE              | 3.282                                           | 3.810  | 1.082                                                                | 0.956   | 0.161                    | 0.79           |
| LTB4                | 0.501                                           | 0.699  | 0.339                                                                | 0.648   | 0.161                    | 0.79           |
| 11,12-EET           | 0.474                                           | 0.319  | 0.503                                                                | 0.421   | 0.065                    | 1.19           |
| 11,12 DHET          | 0.247                                           | 0.156  | 0.179                                                                | 0.099   | 0.001                    | 2.96           |
| 14,15-EET           | 0.597                                           | 0.355  | 1.112                                                                | 1.244   | 0.442                    | 0.35           |
| 14,15 DHET          | 0.602                                           | 0.312  | 0.457                                                                | 0.262   | 0.001                    | 2.96           |
| 17-HETE             | 0.036                                           | 0.042  | 0.078                                                                | 0.063   | 0.328                    | 0.48           |
| 18-HETE             | 0.200                                           | 0.108  | 0.156                                                                | 0.088   | 0.161                    | 0.79           |
| 5,6-EET             | 0.405                                           | 0.423  | 0.552                                                                | 0.628   | 0.328                    | 0.48           |
| 5,6-DHET            | 1.412                                           | 1.480  | 1.734                                                                | 2.848   | 0.574                    | 0.24           |
| 8,9-EET             | 0.707                                           | 0.353  | 0.478                                                                | 0.515   | 0.065                    | 1.19           |
| 8,9-DHET            | 0.548                                           | 0.478  | 0.445                                                                | 0.411   | 0.105                    | 0.98           |
| 10-HDoHE            | 1.497                                           | 0.772  | 2.584                                                                | 2.927   | 0.721                    | 0.14           |
| 11-HDoHE            | 1.457                                           | 0.844  | 5.254                                                                | 9.961   | 0.959                    | 0.02           |
| 13-HDoHE            | 0.749                                           | 0.539  | 2.964                                                                | 4.620   | 0.130                    | 0.88           |
| 14-HDoHE            | 20.389                                          | 13.908 | 71.588                                                               | 136.287 | 0.959                    | 0.02           |
| 20-HDoHE            | 1.535                                           | 1.258  | 5.072                                                                | 5.131   | 0.001                    | 3.21           |
| 4-HDoHE             | 1.956                                           | 1.087  | 4.511                                                                | 4.272   | 0.235                    | 0.63           |
| 7-HDoHE             | 0.745                                           | 0.480  | 1.102                                                                | 1.313   | 0.959                    | 0.02           |
| 8-HDoHE             | 1.539                                           | 0.973  | 6.281                                                                | 12.603  | 1.000                    | 0.00           |
| RvD1                | 0.158                                           | 0.244  | 0.190                                                                | 0.170   | 1.000                    | 0.00           |
| 16,17-EDP           | 0.681                                           | 0.684  | 3.091                                                                | 4.692   | 0.028                    | 1.55           |
| 19,20-EDP           | 2.372                                           | 2.303  | 6.403                                                                | 5.350   | 0.001                    | 3.21           |
| PGF3a               | 0.697                                           | 0.381  | 0.324                                                                | 0.219   | 0.005                    | 2.33           |
| 11-HEPE             | 0.080                                           | 0.056  | 0.511                                                                | 1.076   | 0.065                    | 1.19           |
| 12-HEPE             | 11.309                                          | 9.694  | 41.345                                                               | 91.027  | 0.721                    | 0.14           |
| 15-HEPE             | 0.124                                           | 0.067  | 0.711                                                                | 1.672   | 0.878                    | 0.06           |

|              |       |       |       |       |       |      |
|--------------|-------|-------|-------|-------|-------|------|
| 5-HEPE       | 0.413 | 0.253 | 1.121 | 1.259 | 0.161 | 0.79 |
| 8-HEPE       | 0.231 | 0.194 | 1.463 | 2.984 | 0.065 | 1.19 |
| 9-HEPE       | 0.360 | 0.233 | 1.712 | 3.513 | 0.721 | 0.14 |
| 11,12-DiHETE | 5.656 | 4.755 | 7.747 | 4.935 | 0.382 | 0.42 |
| 11,12-EEQ    | 0.105 | 0.070 | 0.343 | 0.424 | 0.161 | 0.79 |
| 14,15-DiHETE | 0.666 | 0.496 | 0.670 | 0.295 | 0.574 | 0.24 |
| 14,15-EEQ    | 0.055 | 0.045 | 0.158 | 0.167 | 0.195 | 0.71 |
| 17,18-DiHETE | 0.484 | 0.376 | 0.889 | 0.311 | 0.050 | 1.30 |
| 17,18-EEQ    | 0.181 | 0.144 | 0.530 | 0.507 | 0.050 | 1.30 |
| 18-HEPE      | 0.206 | 0.165 | 0.674 | 0.550 | 0.003 | 2.53 |
| 5,6-DiHETE   | 0.393 | 0.139 | 0.744 | 0.491 | 0.721 | 0.14 |
| 5,6-EEQ      | 0.305 | 0.165 | 0.621 | 0.458 | 0.442 | 0.35 |
| 8,9-DiHETE   | 1.953 | 1.235 | 3.632 | 3.016 | 0.235 | 0.63 |
| 8,9-EEQ      | 0.113 | 0.066 | 0.229 | 0.212 | 0.798 | 0.10 |

---
